# Supplementary material for: Single-Cell RNA-seq Reveals Obesity-Induced Alterations in the Brca1-Mutated Mammary Gland Microenvironment
Source: MDPI journal article supplement (doi:10.3390/cancers12082235), 2020-08-10
Supplement: s1 [file s1]

RD-1

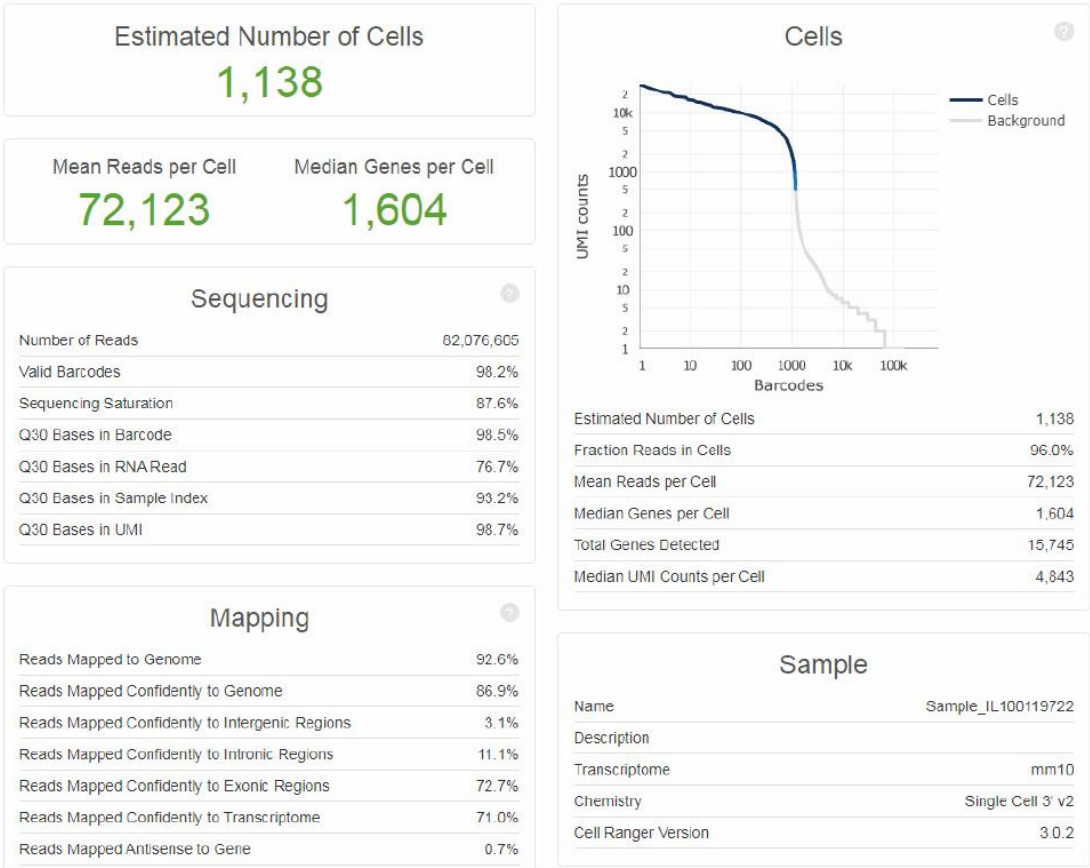

## RD-2

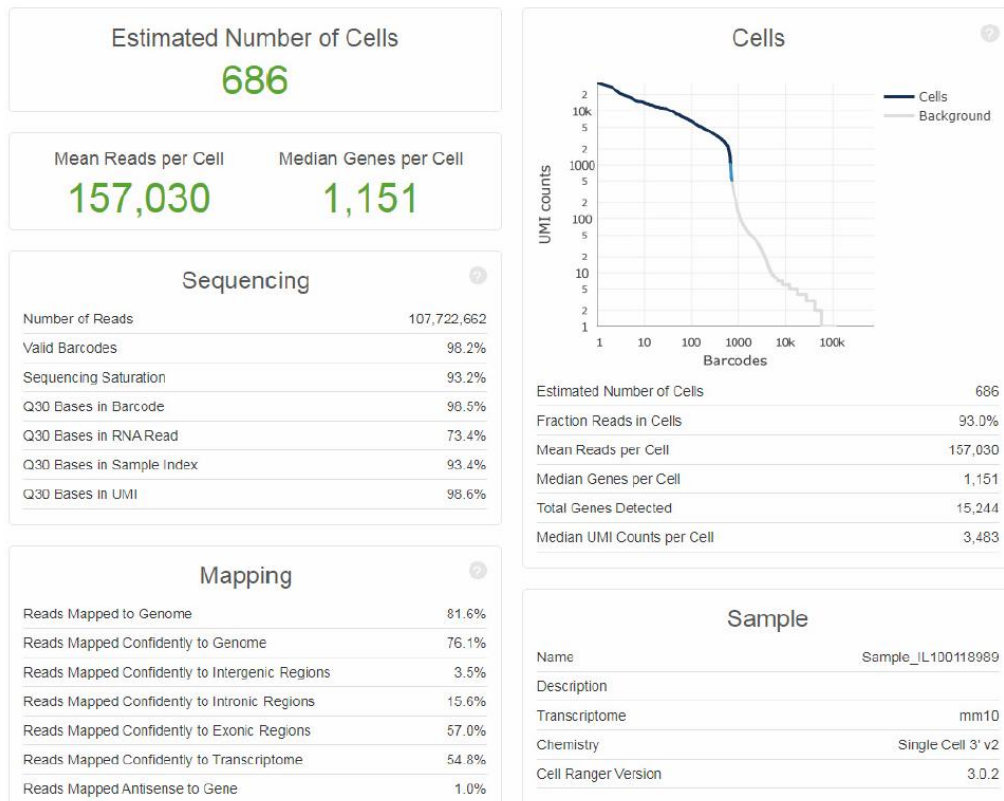

**Figure S2.** This QC report for the scRNA-seq of the RD-2 cell sample was generated from CellRanger analysis.

# HFD-1

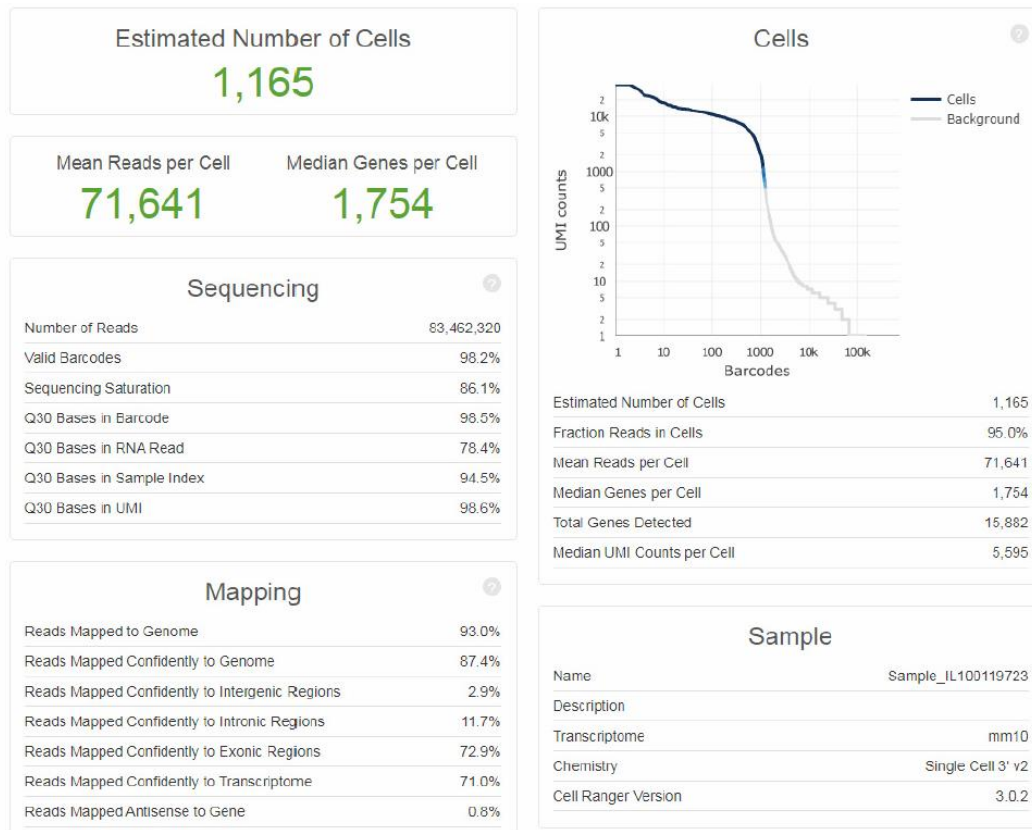

**Figure S3.** This QC report for the scRNA-seq of the HFD-1 cell sample was generated from CellRanger analysis.

## HFD-2

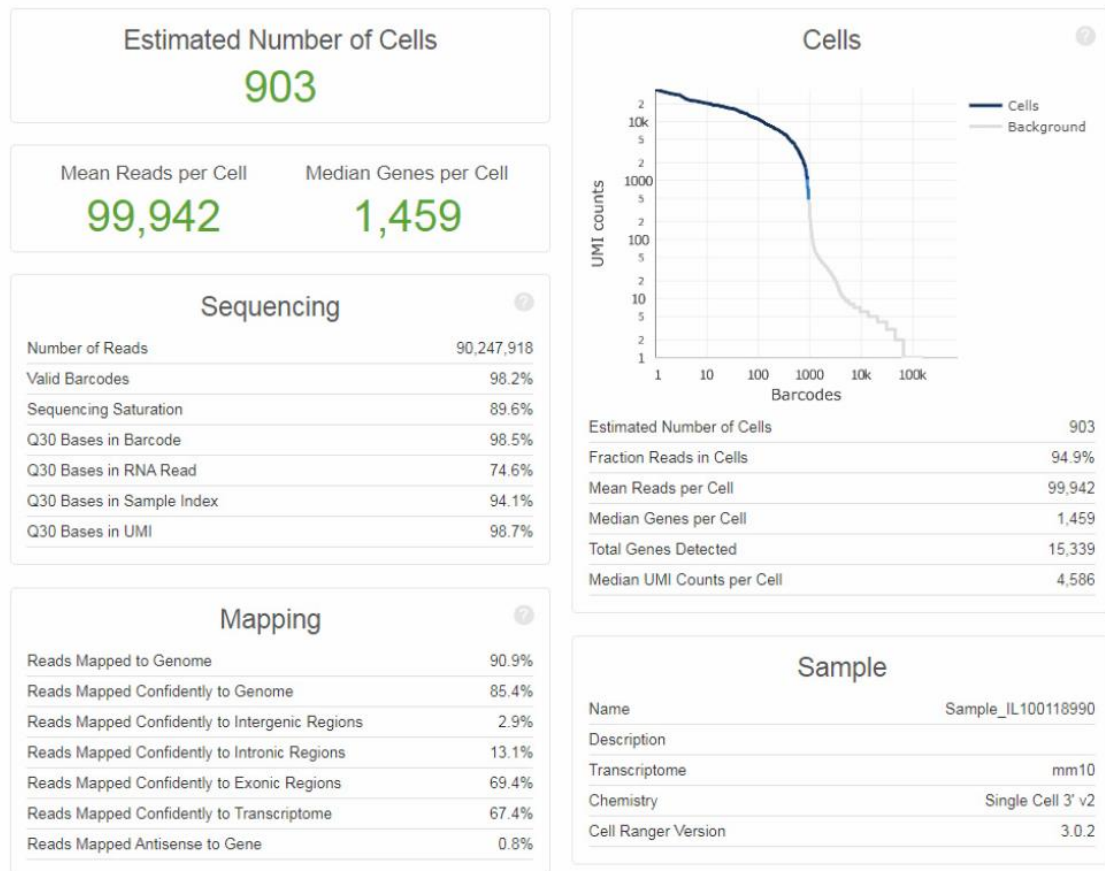

**Figure S4.** This QC report for the scRNA-seq of the HFD-2 cell sample was generated from CellRanger analysis.

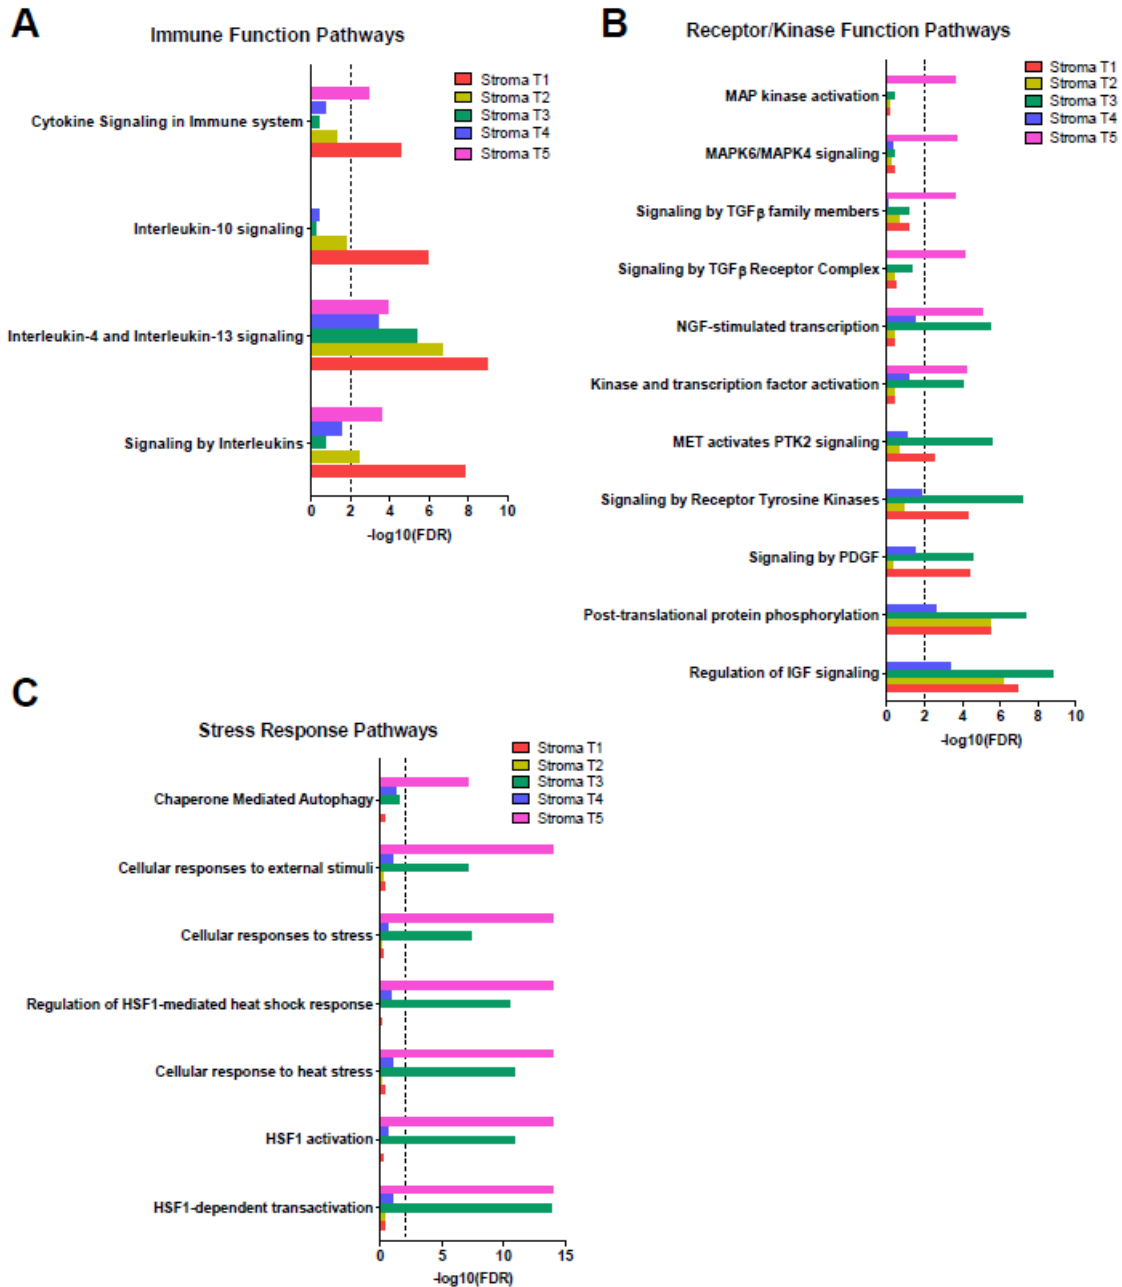

**Figure S5.** Gene enrichment analysis of biological function pathways in different stromal subtype cells. Three different classified pathways are shown here, including immune function pathways (A), receptor/kinase function pathways (B) and stress response pathways (C). The cut-off FDR (0.01,  $-\log_{10}(\text{FDR}) = 2$ ) is shown as a dash line in figures.
